# Supplementary material
Source: PubMed Central journal article supplement (PMC4283198)
Supplement: NIHMS649846-supplement-suppl_tables.pdf [file NIHMS649846-supplement-suppl_tables.pdf]

**Online Table 1. Percentage of cumulative waiting time in each UNOS category (Era 1 – 1/20/1999 to 7/11/2006, Era 2 – 7/12/2006 to 4/30/2012, all data units in %).**

| <b>Region</b>   | <b>Status 1A</b> |             | <b>Status 1B</b> |             | <b>Status 2</b> |             |
|-----------------|------------------|-------------|------------------|-------------|-----------------|-------------|
|                 | <b>Era1</b>      | <b>Era2</b> | <b>Era1</b>      | <b>Era2</b> | <b>Era1</b>     | <b>Era2</b> |
| <b>Region 1</b> | 19.8             | 43.1        | 34.0             | 30.7        | 34.8            | 17.9        |
| <b>Region 2</b> | 20.9             | 25.2        | 42.2             | 48.4        | 28.3            | 16.2        |
| <b>Region 3</b> | 18.6             | 27.1        | 36.5             | 46.1        | 37.0            | 15.9        |
| <b>Region 4</b> | 16.7             | 24.9        | 38.3             | 48.9        | 37.6            | 18.1        |
| <b>Region 5</b> | 20.9             | 31.5        | 21.7             | 27.3        | 48.1            | 27.8        |
| <b>Region 6</b> | 12.2             | 19.9        | 36.6             | 46.5        | 42.1            | 23.0        |
| <b>Region 7</b> | 13.3             | 26.5        | 33.6             | 40.8        | 44.5            | 22.1        |
| <b>Region 8</b> | 12.2             | 13.4        | 38.8             | 46.4        | 41.4            | 27.8        |
| <b>Region 9</b> | 29.6             | 33.5        | 40.1             | 51.9        | 25.3            | 12.0        |
| <b>Region10</b> | 21.1             | 28.1        | 39.0             | 35.2        | 32.0            | 21.0        |
| <b>Region11</b> | 15.5             | 24.5        | 37.4             | 44.9        | 40.3            | 23.6        |
| <b>All</b>      | <b>18.8</b>      | <b>27.1</b> | <b>35.6</b>      | <b>42.0</b> | <b>37.6</b>     | <b>20.6</b> |

**Online Table 2. UNOS listing status at the time of transplantation (Era 1 – 1/20/1999 to 7/11/2006, Era 2 – 7/12/2006 to 4/30/2012, all data units in %).**

| <b>Region</b>   | <b>Status 1A</b> |             | <b>Status 1B</b> |             | <b>Status 2</b> |             |
|-----------------|------------------|-------------|------------------|-------------|-----------------|-------------|
|                 | <b>Era1</b>      | <b>Era2</b> | <b>Era1</b>      | <b>Era2</b> | <b>Era1</b>     | <b>Era2</b> |
| <b>Region 1</b> | 48.2             | 78.8        | 31.9             | 16.1        | 19.9            | 5.1         |
| <b>Region 2</b> | 42.8             | 52.0        | 38.9             | 40.8        | 18.2            | 7.2         |
| <b>Region 3</b> | 38.5             | 48.1        | 38.2             | 45.5        | 23.3            | 6.4         |
| <b>Region 4</b> | 30.0             | 51.4        | 47.7             | 42.8        | 22.3            | 5.8         |
| <b>Region 5</b> | 34.5             | 49.0        | 28.5             | 33.4        | 36.9            | 17.6        |
| <b>Region 6</b> | 15.3             | 36.3        | 47.9             | 47.8        | 36.3            | 15.8        |
| <b>Region 7</b> | 30.8             | 57.7        | 40.0             | 32.1        | 29.0            | 10.2        |
| <b>Region 8</b> | 21.4             | 32.7        | 47.9             | 55.2        | 30.7            | 12.1        |
| <b>Region 9</b> | 56.2             | 69.2        | 32.8             | 27.7        | 10.9            | 3.1         |
| <b>Region10</b> | 36.3             | 53.9        | 43.9             | 39.7        | 19.7            | 6.3         |
| <b>Region11</b> | 30.2             | 50.3        | 39.3             | 42.7        | 30.4            | 7.0         |
| <b>All</b>      | <b>35.8</b>      | <b>52.0</b> | <b>38.8</b>      | <b>39.0</b> | <b>25.3</b>     | <b>9.0</b>  |

**Online Table 3. Differences in Ischemic Time During HTx Between the 2 Eras (Era 1 – 1/20/1999 to 7/11/2006, Era 2 – 7/12/2006 to 4/30/2012).**

| <b>Ischemic time<br/>(hours)</b> | <b>Era1</b>      | <b>Era 2</b>     | <b>p-value</b>   |
|----------------------------------|------------------|------------------|------------------|
| <b>Region 1</b>                  | 2.73±0.79        | 3.23±0.87        | <0.001           |
| <b>Region 2</b>                  | 3.11±1.03        | 3.25±1.01        | <0.001           |
| <b>Region 3</b>                  | 3.13±1.10        | 3.37±1.17        | <0.001           |
| <b>Region 4</b>                  | 2.95±1.05        | 3.14±1.02        | <0.001           |
| <b>Region 5</b>                  | 3.29±1.11        | 3.48±1.08        | <0.001           |
| <b>Region 6</b>                  | 3.56±1.38        | 3.98±1.20        | <0.001           |
| <b>Region 7</b>                  | 3.24±1.01        | 3.26±1.08        | 0.648            |
| <b>Region 8</b>                  | 2.94±0.99        | 3.11±1.10        | 0.005            |
| <b>Region 9</b>                  | 3.35±0.96        | 3.23±1.07        | 0.032            |
| <b>Region 10</b>                 | 3.07±0.84        | 3.02±0.90        | 0.208            |
| <b>Region 11</b>                 | 3.27±1.01        | 3.03±0.93        | <0.001           |
| <b>all</b>                       | <b>3.16±1.04</b> | <b>3.26±1.06</b> | <b>&lt;0.001</b> |
